# Supplementary material for: Parental mental health conditions and use of healthcare services in children the first year of life– a register-based, nationwide study
Source: BMC Public Health. 2021 Mar 21;21:557. doi: 10.1186/s12889-021-10625-y (PMC7981963; doi:10.1186/s12889-021-10625-y)
Supplement: Supplementary file 1 — Additional file 1: Supplementary Table 1. Characteristics of the excluded population. [file 12889_2021_10625_MOESM1_ESM.docx]

### **Supplementary table 1. Characteristics of the excluded population**

| |  | **Mother** | | |  | **Father** | | | | --- | --- | --- | --- | --- | --- | --- | --- | |  | **No mental health condition** | **Minor** | **Moderate-severe** |  | **No mental health condition** | **Minor** | **Moderate-severe** | | **Children total N (%)** | 75044 (87.3) | 5404 (6.3) | 5542 (6.4) |  | 65544 (90.1) | 3809 (5.2) | 3412 (4.7) | | Boys, percentages | 51.3 | 52.1 | 51.8 |  | 51.5 | 51.5 | 52.1 | | Girls, percentages | 48.6 | 47.9 | 48.1 |  | 48.5 | 48.4 | 47.9 | | **Parity** | | | | | | | | | First child | 58.0 | 55.9 | 55.8 |  | 56.8 | 53.7 | 52.3 | | Second or more | 40.3 | 42.8 | 42.2 |  | 41.5 | 44.7 | 46.3 | | Missing | 1.7 | 1.4 | 2.0 |  | 1.6 | 1.7 | 1.4 | | **Age** | | | | | | | | | <25 | 20.5 | 11.5 | 25.9 |  | 6.7 | 3.0 | 7.6 | | 25-32 | 46.0 | 36.1 | 37.7 |  | 30.6 | 20.8 | 25.1 | | >32 | 33.1 | 52.4 | 36.2 |  | 43.1 | 61.5 | 56.7 | | Missing | 0.4 | 0.0 | 0.1 |  | 19.6 | 14.6 | 10.7 | | **Educational level** | | | | | | | | | Low | 33.5 | 26.2 | 47.4 |  | 27.9 | 30.3 | 43.4 | | Medium | 26.2 | 32.1 | 27.3 |  | 28.1 | 33.9 | 30.1 | | High | 28.1 | 37.5 | 19.8 |  | 27.0 | 27.4 | 18.4 | | Missing | 12.2 | 4.2 | 5.5 |  | 17.1 | 8.5 | 8.1 | | **Household income** | | | | | | | | | Low | 48.5 | 39.9 | 49.4 |  | 48.4 | 48.5 | 56.9 | | Medium | 12.3 | 17.7 | 10.1 |  | 11.8 | 11.8 | 6.2 | | High | 6.5 | 9.3 | 3.3 |  | 6.5 | 6.1 | 2.1 | | Missing | 32.7 | 33.1 | 37.2 |  | 33.3 | 33.6 | 34.8 | | **Living with cohabiting parents** | | | | | | | | | Yes | 62.0 | 41.6 | 36.4 |  | 69.6 | 72.7 | 70.2 | | No | 2.2 | 3.5 | 4.7 |  | 2.7 | 4.1 | 5.2 | | Missing | 35.8 | 54.8 | 58.9 |  | 27.7 | 23.2 | 24.6 | | **Mental health condition of the other parent** | | | | | | | | | No mental health condition | 79.3 | 56.8 | 53.3 |  | 90.8 | 83.0 | 82.7 | | Minor | 4.2 | 6.4 | 5.5 |  | 4.7 | 9.1 | 5.8 | | Moderate-severe | 3.8 | 3.6 | 7.1 |  | 4.5 | 8.0 | 11.5 | |  |  |  |  |
| --- | --- | --- | --- | --- | --- | --- | --- | --- | --- | --- | --- | --- | --- | --- | --- | --- | --- | --- | --- | --- | --- | --- | --- | --- | --- | --- | --- | --- | --- | --- | --- | --- | --- | --- | --- | --- | --- | --- | --- | --- | --- | --- | --- | --- | --- | --- | --- | --- | --- | --- | --- | --- | --- | --- | --- | --- | --- | --- | --- | --- | --- | --- | --- | --- | --- | --- | --- | --- | --- | --- | --- | --- | --- | --- | --- | --- | --- | --- | --- | --- | --- | --- | --- | --- | --- | --- | --- | --- | --- | --- | --- | --- | --- | --- | --- | --- | --- | --- | --- | --- | --- | --- | --- | --- | --- | --- | --- | --- | --- | --- | --- | --- | --- | --- | --- | --- | --- | --- | --- | --- | --- | --- | --- | --- | --- | --- | --- | --- | --- | --- | --- | --- | --- | --- | --- | --- | --- | --- | --- | --- | --- | --- | --- | --- | --- | --- | --- | --- | --- | --- | --- | --- | --- | --- | --- | --- | --- | --- | --- | --- | --- | --- | --- | --- | --- | --- | --- | --- | --- | --- | --- | --- | --- | --- | --- | --- | --- | --- | --- | --- | --- | --- | --- | --- | --- | --- | --- | --- | --- | --- | --- | --- | --- | --- | --- | --- | --- | --- | --- | --- | --- | --- | --- | --- | --- | --- | --- | --- | --- | --- | --- | --- | --- | --- | --- | --- | --- | --- | --- | --- | --- | --- | --- | --- | --- | --- | --- | --- | --- | --- | --- | --- | --- | --- | --- | --- | --- | --- | --- | --- | --- | --- | --- | --- | --- | --- | --- | --- | --- | --- | --- | --- | --- | --- | --- | --- | --- | --- | --- | --- |

### 
