# Supplementary material for: Parental mental health conditions and use of healthcare services in children the first year of life– a register-based, nationwide study
Source: BMC Public Health. 2021 Mar 21;21:557. doi: 10.1186/s12889-021-10625-y (PMC7981963; doi:10.1186/s12889-021-10625-y)
Supplement: Supplementary file 6 — Additional file 6: Supplementary Table 6. Adjusted incidence rate ratios (95% confidence interval) of each outcome in strata of calendar year. [file 12889_2021_10625_MOESM6_ESM.xlsx]

## Sheet: Ark1
Supplementary table 6. Adjusted incidence rate ratios (95% confidence interval) of each outcome in strata of calendar year
		2000-2003				2004-2007				2008-2011				2012-2016
Adjusted for sex, parental age, parental education, family income, family type and parity. Complete case analysis based on 84 % of the study population.
GP contacts daytime, adjusted
		Mother				Mother				Mother				Mother
	Mental health condition	No mental health condition	Minor	Moderate-severe		No mental health condition	Minor	Moderate-severe		No mental health condition	Minor	Moderate-severe		No mental health condition	Minor	Moderate-severe
Father	No mental health condtion	Reference	1.19 (1.17 - 1.21)	1.19 (1.17 - 1.21)		Reference	1.17 (1.16 - 1.18)	1.17 (1.15 - 1.18)		Reference	1.18 (1.17 - 1.19)	1.18 (1.17 - 1.20)		Reference	1.17 (1.16 - 1.18)	1.19 (1.18 - 1.20)
	Minor	1.04 (1.02 - 1.06)	1.19 (1.14 - 1.24)	1.23 (1.16 - 1.32)		1.06 (1.05 - 1.08)	1.22 (1.19 - 1.26)	1.23 (1.18 - 1.28)		1.08 (1.06 - 1.09)	1.23 (1.21 - 1.26)	1.27 (1.23 - 1.31)		1.06 (1.05 - 1.08)	1.23 (1.21 - 1.25)	1.25 (1.22 - 1.29)
	Moderate-severe	1.04 (1.01 - 1.06)	1.23 (1.14 - 1.32)	1.17 (1.11 - 1.23)		1.05 (1.03 - 1.07)	1.13 (1.08 - 1.19)	1.16 (1.12 - 1.20)		1.04 (1.02 - 1.06)	1.20 (1.16 - 1.24)	1.21 (1.18 - 1.25)		1.07 (1.05 - 1.08)	1.17 (1.13 - 1.20)	1.19 (1.16 - 1.22)
Out-of hour contacts, adjusted
	Mental health condition	No mental health condition	Minor	Moderate-severe		No mental health condition	Minor	Moderate-severe		No mental health condition	Minor	Moderate-severe		No mental health condition	Minor	Moderate-severe
Father	No mental health condition	Reference	1.28 (1.25 - 1.32)	1.37 (1.32 - 1.41)		Reference	1.26 (1.23 - 1.29)	1.35 (1.32 - 1.39)		Reference	1.26 (1.24 - 1.29)	1.38 (1.35 - 1.42)		Reference	1.26 (1.23 - 1.28)	1.43 (1.40 - 1.47)
	Minor	1.10 (1.06 - 1.14)	1.21 (1.12 - 1.31)	1.43 (1.28 - 1.61)		1.14 (1.11 - 1.18)	1.39 (1.32 - 1.46)	1.40 (1.30 - 1.51)		1.16 (1.13 - 1.19)	1.36 (1.30 - 1.42)	1.50 (1.42 - 1.59)		1.19 (1.15 - 1.22)	1.41 (1.36 - 1.47)	1.52 (1.44 - 1.60)
	Moderate-severe	1.15 (1.11 - 1.20)	1.48 (1.30 - 1.67)	1.29 (1.17 - 1.41)		1.17 (1.13 - 1.21)	1.37 (1.26 - 1.49)	1.42 (1.33 - 1.52)		1.22 (1.17 - 1.26)	1.33 (1.24 - 1.42)	1.41 (1.34 - 1.50)		1.24 (1.19 - 1.28)	1.32 (1.24 - 1.40)	1.48 (1.40 - 1.56)
ER contacts, adjusted
	Mental health condition	No mental health condition	Minor	Moderate-severe		No mental health condition	Minor	Moderate-severe		No mental health condition	Minor	Moderate-severe		No mental health condition	Minor	Moderate-severe
Father	No mental health condition	Reference	1.10 (1.01 - 1.20)	1.41 (1.29 - 1.54)		Reference	1.14 (1.06 - 1.23)	1.40 (1.29 - 1.53)		Reference	1.16 (1.08 - 1.24)	1.37 (1.26 - 1.49)		Reference	1.13 (1.08 - 1.18)	1.30 (1.23 - 1.37)
	Minor	1.10 (0.99 - 1.22)	0.99 (0.77 - 1.27)	1.61 (1.17 - 2.22)		1.15 (1.05 - 1.27)	1.15 (0.97 - 1.37)	1.58 (1.26 - 1.97)		1.16 (1.06 - 1.28)	1.41 (1.22 - 1.63)	1.42 (1.17 - 1.72)		1.12 (1.05 - 1.19)	1.23 (1.13 - 1.35)	1.29 (1.14 - 1.44)
	Moderate-severe	1.31 (1.16 - 1.47)	1.38 (0.96 - 1.98)	1.96 (1.53 - 2.50)		1.26 (1.12 - 1.42)	1.37 (1.06 - 1.79)	1.32 (1.07 - 1.63)		1.42 (1.25 - 1.60)	1.28 (1.01 - 1.61)	1.25 (1.02 - 1.52)		1.28 (1.18 - 1.39)	1.23 (1.08 - 1.40)	1.29 (1.15 - 1.46)
Inpatient contacts, adjusted
	Mental health condition	No mental health condition	Minor	Moderate-severe		No mental health condition	Minor	Moderate-severe		No mental health condition	Minor	Moderate-severe		No mental health condition	Minor	Moderate-severe
Father	No metal health condition	Reference	1.28 (1.23 - 1.33)	1.37 (1.31 - 1.42)		Reference	1.29 (1.25 - 1.32)	1.40 (1.35 - 1.45)		Reference	1.27 (1.23 - 1.30)	1.43 (1.39 - 1.48)		Reference	1.21 (1.18 - 1.24)	1.35 (1.31 - 1.38)
	Minor	1.10 (1.04 - 1.15)	1.38 (1.25 - 1.54)	1.26 (1.08 - 1.48)		1.14 (1.09 - 1.18)	1.35 (1.26 - 1.45)	1.49 (1.36 - 1.64)		1.10 (1.06 - 1.14)	1.34 (1.27 - 1.42)	1.56 (1.45 - 1.67)		1.09 (1.05 - 1.12)	1.29 (1.23 - 1.34)	1.46 (1.38 - 1.54)
	Moderate-severe	1.06 (1.00 - 1.12)	1.25 (1.05 - 1.49)	1.33 (1.18 - 1.51)		1.10 (1.05 - 1.16)	1.26 (1.13 - 1.41)	1.41 (1.29 - 1.53)		1.16 (1.10 - 1.22)	1.34 (1.23 - 1.47)	1.48 (1.38 - 1.59)		1.14 (1.09 - 1.19)	1.22 (1.14 - 1.31)	1.40 (1.32 - 1.48)
Outpatient contacts, adjusted
	Mental health condition	No mental health condition	Minor	Moderate-severe		No mental health condition	Minor	Moderate-severe		No mental health condition	Minor	Moderate-severe		No mental health condition	Minor	Moderate-severe
Father	No mental health condtion	Reference	1.25 (1.15 - 1.37)	1.27 (1.14 - 1.40)		Reference	1.31 (1.23 - 1.39)	1.24 (1.16 - 1.34)		Reference	1.15 (1.09 - 1.20)	1.30 (1.22 - 1.38)		Reference	1.19 (1.14 - 1.23)	1.31 (1.25 - 1.37)
	Minor	1.06 (0.95 - 1.18)	1.50 (1.17 - 1.93)	2.17 (1.50 - 3.15)		1.04 (0.96 - 1.13)	1.14 (0.99 - 1.31)	1.60 (1.31 - 1.96)		1.09 (1.03 - 1.17)	1.37 (1.24 - 1.52)	1.56 (1.35 - 1.79)		1.08 (1.03 - 1.14)	1.19 (1.11 - 1.28)	1.51 (1.37 - 1.66)
	Moderate-severe	1.12 (0.98 - 1.28)	2.07 (1.37 - 3.12)	1.41 (1.04 - 1.90)		1.18 (1.07 - 1.31)	1.13 (0.90 - 1.42)	1.37 (1.14 - 1.64)		1.09 (0.99 - 1.19)	1.34 (1.13 - 1.58)	1.66 (1.44 - 1.91)		1.12 (1.05 - 1.20)	1.07 (0.96 - 1.20)	1.46 (1.32 - 1.62)
IRR: Incidence rate ratio
CI: Confidence interval
